# Supplementary material for: Standardized food challenges are subject to variability in interpretation of clinical symptoms
Source: Springer Nature journal article supplement (doi:10.1186/s13601-014-0043-6), 2014-01-01
Supplement: MOESM1 [file 9786908]

## Food Challenge Score Sheet – DBPCFC peanut

| Minutes after start | Portion | Time (hr) | Observations / Symptoms                                                                             |
|---------------------|---------|-----------|-----------------------------------------------------------------------------------------------------|
| <b>Part 1</b>       |         |           |                                                                                                     |
| T= 0                | 1       | 10.30     | At 10:35 patient reports mild abdominal pain, the pain disappeared spontaneously within 10 minutes. |
| T=15                | 2       | 10.45     | -                                                                                                   |
| T=30                | 3       | 11.00     | Patient does not like the food and eats very slowly.                                                |
| T=45                | 4       | 11.15     | -                                                                                                   |
| T=60                | 5       | 11.30     | -                                                                                                   |
| T=75                | 6       | 11.45     | -                                                                                                   |
| T=90                | 7       | 12.00     | At 12:05 mild sneezing (2 times), no other symptoms.                                                |
| T=105               | 8       | 12.15     | -                                                                                                   |
| <b>Part 2</b>       |         |           |                                                                                                     |
| T=120               | 9       | 12.30     | -                                                                                                   |
| T=150               | 10      | 13.00     | At 13.15 Severe vomiting (1 time). No other symptoms.                                               |
| T=180               | 11      | NA        | -                                                                                                   |
| T=210               | 12      | NA        | -                                                                                                   |
| T =240              | 13      | NA        | -                                                                                                   |

### Other comments:

\_\_\_\_\_  
 Patient is a very difficult eater, does not like the food during challenge.  
 \_\_\_\_\_  
 \_\_\_\_\_  
 \_\_\_\_\_
